# Supplementary material
Source: PubMed Central journal article supplement (PMC3631696)
Supplement: 1304238110_pnas.201304238SI.pdf [file 1304238110_pnas.201304238SI.pdf]

# Supporting Information

Park et al. 10.1073/pnas.1304238110

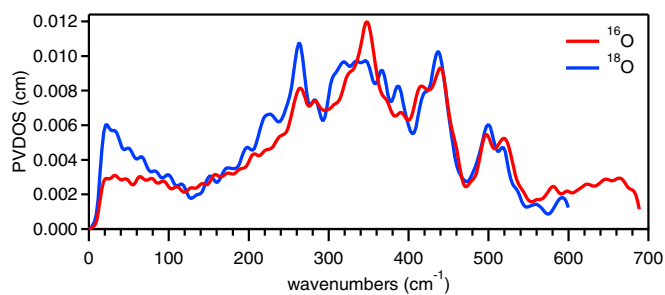

Fig. S1. NRVS spectra of the Fe(IV)<sub>2</sub> complexes of 1 with <sup>16</sup>O (red) and <sup>18</sup>O (blue) isotopes.

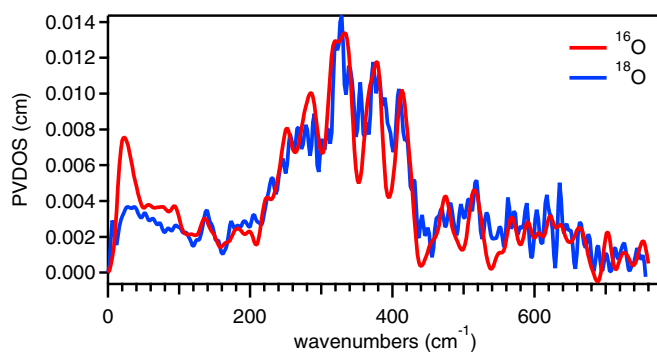

Fig. S2. NRVS spectra of the Fe(IV)<sub>2</sub> complexes of 2 with <sup>16</sup>O (red) and <sup>18</sup>O (blue) isotopes.

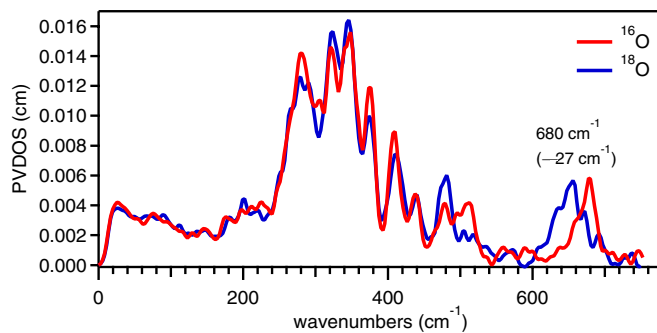

Fig. S3. NRVS spectra of the Fe(III)Fe(IV) complexes of 2 with <sup>16</sup>O (red) and <sup>18</sup>O (blue) isotopes.

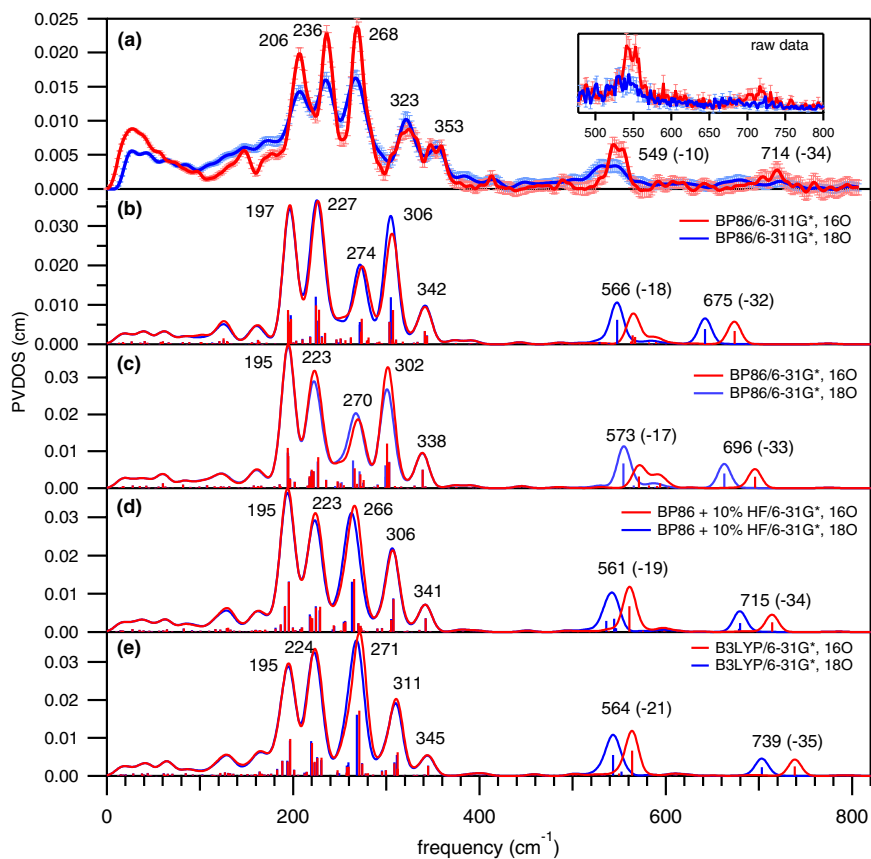

**Fig. S4.** PVDOS of the  $\text{Fe(III)}_2$  precursor of **1** obtained by (A) experiment and DFT calculations using (B) pure BP functional and 6-311G\* basis set, (C) pure BP functional and 6-31G\* basis set, (D) 10% HF/90% BP functional and 6-31G\* basis set, and (E) 20% HF/80% BP functional (i.e., B3LYP) and 6-31G\* basis set. Frequencies are denoted with  $^{16/18}\text{O}$  isotopic shifts in parentheses. Compared with the data in (A), the simulation in (B) shows over- and underestimated energies for the symmetric and anti-symmetric  $\text{Fe}-\mu\text{O}$  stretch, respectively, and the intensity of the peak at  $274\text{ cm}^{-1}$  is underestimated. The simulation in (C) shows that using the double-zeta basis set reproduces the simulation in (B) although stretch ( $>500\text{ cm}^{-1}$ ) and bend ( $<400\text{ cm}^{-1}$ ) modes are up- and down-shifted, respectively, compared with (B). Addition of 10% HF exchange (C vs. D) improves the energies of the  $\text{Fe}-\mu\text{O}$  stretches and the intensity of the peak at  $266\text{ cm}^{-1}$ , although using 20% HF exchange in (E) overestimates the energy of the anti-symmetric  $\text{Fe}-\mu\text{O}$  stretch.

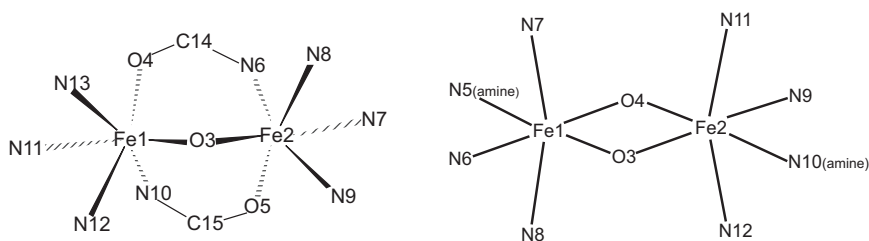

**Fig. S5.** Core structures of **1** (Left) and **2** (Right) and their atomic numbering schemes.



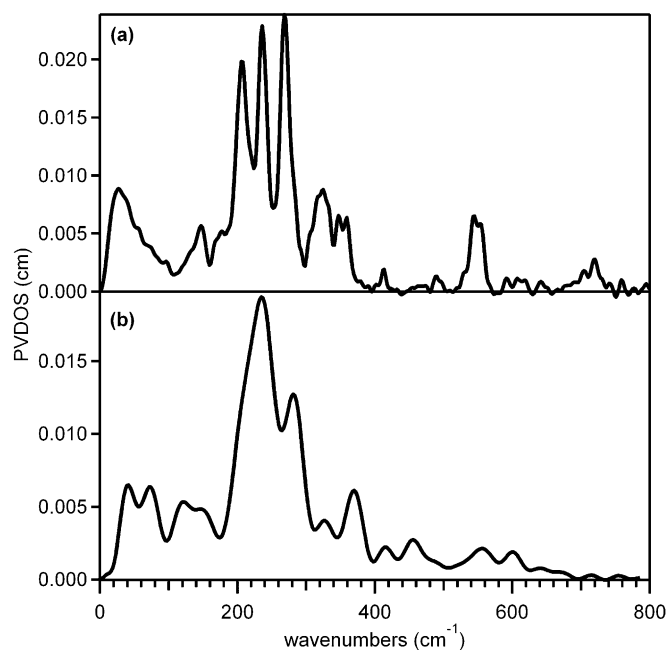

**Fig. S8.** Experimental NRVS spectra of high-spin Fe(III)<sub>2</sub> complexes with (A) a mono-oxo bridge (reproduced from Fig. 2C) and (B) a di-hydroxo bridge ([Fe<sub>2</sub>(μ-OH)<sub>2</sub>(6Me<sub>2</sub>-BPP)<sub>2</sub>]<sup>2+</sup>, reproduced from ref. 1). Considering that variation in the Fe oxidation state causes only minor changes in NRVS spectra and using the di-hydroxo structure to model a di-oxo core, the data on these high-spin Fe(III)<sub>2</sub> complexes experimentally support the DFT predictions for the high-spin Fe(IV)<sub>2</sub> analogs of **1** and **2** (Fig. 7). Spectrum (A) shows a more split-peak pattern for the mono-oxo structure, and spectrum (B) shows a merged-feature at 200~300 cm<sup>-1</sup> with a small peak at ~370 cm<sup>-1</sup> for the di-hydroxo structure.

1. Park K, et al. (2013) NRVS and DFT study of peroxo-bridged biferric complexes: Structural insight into peroxy intermediates of binuclear non-heme iron enzymes. *Angew Chem Int Ed* 52:1294–1298.

**Table S1. Comparison with other vibrational spectroscopic data for **1****

| Fe(III)-μO-Fe(III) species                                                           | $\nu_s(\text{Fe}-\mu\text{O})/\text{cm}^{-1}$ , <sup>a</sup> | $\nu_{as}(\text{Fe}-\mu\text{O})/\text{cm}^{-1}$ , <sup>b</sup> | Fe-μO-Fe/ <sup>c</sup> |
|--------------------------------------------------------------------------------------|--------------------------------------------------------------|-----------------------------------------------------------------|------------------------|
| <b>1</b>                                                                             | 549 (-10)                                                    | 714 (-34)                                                       | 114                    |
| [Fe <sub>2</sub> (μO)(tacn) <sub>2</sub> (OAc) <sub>2</sub> ] <sup>2+</sup> (ref. 1) | 540 (-17)                                                    | 749 (-33)                                                       | 119                    |
| [Fe <sub>2</sub> (μO)(N3) <sub>2</sub> (OBz) <sub>2</sub> ] <sup>2+</sup> (ref. 2)   | 537                                                          | 745 (-45)                                                       | 119                    |
| [Fe <sub>2</sub> (μO)(HBpz <sub>3</sub> ) <sub>2</sub> (OAc) <sub>2</sub> ] (ref. 3) | 528 (-17)                                                    | 749 (-30)                                                       | 124                    |

<sup>18</sup>O isotopic shifts are given in parentheses. Each abbreviation indicates the following: tacn, 1,4,7-triazacyclononane; OAc, acetate; N3, bis(2-benzimidazolylmethyl)amine; OBz, benzoate; and HBpz<sub>3</sub>, hydrotris(1-pyrazolyl)borate.

<sup>a</sup>The frequencies of the symmetric Fe-μO stretch obtained from rR spectroscopy except for the NRVS data of **1**.

<sup>b</sup>The frequencies of the antisymmetric Fe-μO stretch obtained from IR spectroscopy except for the NRVS data of **1**.

<sup>c</sup>Fe-μO-Fe angle obtained from X-ray crystal structures. Ref. 2 showed that  $\nu_s(\text{Fe}-\mu\text{O})$  and  $\nu_{as}(\text{Fe}-\mu\text{O})$  are directly and inversely proportional to Fe-μO-Fe angle, respectively. Given this relation, the NRVS data of **1** are consistent with the rR and IR data of related species.

1. Spool A, et al. (1985) Electronic and vibrational spectroscopic analysis of the (μ-oxo)bis(μ-carboxylato)diiron(III) core: a study of [Fe<sub>2</sub>O(O<sub>2</sub>CCH<sub>3</sub>)<sub>2</sub>(TACN)<sub>2</sub>]<sup>2+</sup>. *Inorg Chem* 24:2156–2162.
2. Sanders-Loehr J, et al. (1989) Electronic and Raman spectroscopic properties of oxo-bridged dinuclear iron centers in proteins and model compounds. *Inorg Chem* 111:8084–8093.
3. Armstrong W, et al. (1984) Assembly and characterization of an accurate model for the diiron center in Hemerythrin. *J Am Chem Soc* 106:3653–3667.

**Table S2. Comparison with other vibrational spectroscopic data for 2**

| Fe(III)-(μO) <sub>2</sub> -Fe(IV) species                                                                   | $\nu_s(\text{Fe}-\mu\text{O})/\text{cm}^{-1}$ |                      |
|-------------------------------------------------------------------------------------------------------------|-----------------------------------------------|----------------------|
|                                                                                                             | <sup>16</sup> O                               | <sup>18</sup> O      |
| <u>2</u>                                                                                                    | 680                                           | 653                  |
| [Fe <sub>2</sub> (μO) <sub>2</sub> (TPA) <sub>2</sub> ] (ClO <sub>4</sub> ) <sub>3</sub>                    | 666.1                                         | 633.9; 641.9 (637.9) |
| [Fe <sub>2</sub> (μO) <sub>2</sub> (3-Me <sub>3</sub> -TPA) <sub>2</sub> ] (ClO <sub>4</sub> ) <sub>3</sub> | 667                                           | 644; 628 (636)       |
| [Fe <sub>2</sub> (μO) <sub>2</sub> (5-Me <sub>3</sub> -TPA) <sub>2</sub> ] (ClO <sub>4</sub> ) <sub>3</sub> | 676.7; 655.7 (666.2)                          | 635                  |

Values in parentheses indicate the center of a Fermi doublet. Except for the NRVs data of 2, the frequencies of the Fe-μO stretch were obtained from rR data reported in ref. 1. Each abbreviation indicates the following: TPA, Tris(pyridyl-2-methyl)amine; 3-Me<sub>3</sub>-TPA, Tris(3-methylpyridyl-2-methyl)amine; and 5-Me<sub>3</sub>-TPA, Tris(5-methylpyridyl-2-methyl)amine.

1. Wilkinson EC, et al. (1998) Raman signature of the Fe<sub>2</sub>O<sub>2</sub> "diamond" core. *J Am Chem Soc* 120:955–962.

**Table S3. First-coordination sphere structures of X-ray crystal and DFT-optimized models of 1**

| <u>1</u>       | $\nu_s(\text{Fe}-\mu\text{O})/\text{cm}^{-1}$ |                               |                               |                               |                               |                                   |                               |             |
|----------------|-----------------------------------------------|-------------------------------|-------------------------------|-------------------------------|-------------------------------|-----------------------------------|-------------------------------|-------------|
|                | Xtal                                          | BP/6-311G*                    | BP/6-31G*                     | B3LYP/6-31G*                  | 10% HF/90% BP + 6-31G*        |                                   |                               |             |
|                | Fe <sup>3+</sup> <sub>2</sub>                 | Fe <sup>3+</sup> <sub>2</sub> | Fe <sup>3+</sup> <sub>2</sub> | Fe <sup>3+</sup> <sub>2</sub> | Fe <sup>3+</sup> <sub>2</sub> | Fe <sup>3+</sup> Fe <sup>4+</sup> | Fe <sup>4+</sup> <sub>2</sub> | hs <u>1</u> |
| Distance (Å)   |                                               |                               |                               |                               |                               |                                   |                               |             |
| Fe1-O3         | 1.794                                         | 1.765                         | 1.758                         | 1.794                         | 1.780                         | 1.748                             | 1.707                         | 1.779       |
| Fe1-O4         | 2.000                                         | 2.059                         | 2.035                         | 2.021                         | 2.022                         | 1.902                             | 1.894                         | 1.845       |
| Fe1-N10        | 2.092                                         | 2.076                         | 2.071                         | 2.108                         | 2.090                         | 1.956                             | 1.960                         | 2.157       |
| Fe1-N11        | 2.242                                         | 2.214                         | 2.215                         | 2.280                         | 2.260                         | 2.019                             | 2.050                         | 2.095       |
| Fe1-N12        | 2.161                                         | 2.168                         | 2.173                         | 2.188                         | 2.174                         | 1.968                             | 1.970                         | 1.984       |
| Fe1-N13        | 2.154                                         | 2.192                         | 2.188                         | 2.187                         | 2.177                         | 1.975                             | 1.984                         | 2.142       |
| Fe2-O3         | 1.796                                         | 1.765                         | 1.758                         | 1.793                         | 1.780                         | 1.748                             | 1.788                         | 1.780       |
| Fe2-O5         | 2.014                                         | 2.052                         | 2.035                         | 2.021                         | 2.021                         | 1.900                             | 1.880                         | 1.845       |
| Fe2-N6         | 2.086                                         | 2.072                         | 2.070                         | 2.110                         | 2.090                         | 1.956                             | 1.921                         | 2.157       |
| Fe2-N7         | 2.231                                         | 2.216                         | 2.217                         | 2.281                         | 2.262                         | 2.068                             | 2.003                         | 2.095       |
| Fe2-N8         | 2.152                                         | 2.177                         | 2.173                         | 2.188                         | 2.175                         | 1.975                             | 1.941                         | 1.984       |
| Fe2-N9         | 2.162                                         | 2.189                         | 2.186                         | 2.187                         | 2.175                         | 1.991                             | 1.965                         | 2.142       |
| Fe1...Fe2      | 3.007                                         | 3.056                         | 3.022                         | 3.056                         | 3.027                         | 3.103                             | 3.101                         | 3.153       |
| Angle (°)      |                                               |                               |                               |                               |                               |                                   |                               |             |
| Fe1-O3-Fe2 (°) | 113.7                                         | 120.0                         | 118.5                         | 116.8                         | 116.5                         | 125.2                             | 125.0                         | 124.7       |

Relevant structural formula and numbering scheme are shown in Fig. S5.

**Table S4. First-coordination sphere structures of X-ray crystal and DFT-optimized models of 2**

| <u>2</u>    | $\nu_s(\text{Fe}-\mu\text{O})/\text{cm}^{-1}$ |                                   |                               |             |
|-------------|-----------------------------------------------|-----------------------------------|-------------------------------|-------------|
|             | Xtal ( <u>2</u> )                             | 10% HF/90% BP + 6-31G*            |                               |             |
|             | Fe <sup>3+</sup> Fe <sup>4+</sup>             | Fe <sup>3+</sup> Fe <sup>4+</sup> | Fe <sup>4+</sup> <sub>2</sub> | hs <u>2</u> |
| Distance, Å |                                               |                                   |                               |             |
| Fe1-O3      | 1.805                                         | 1.814                             | 1.880                         | 1.784       |
| Fe1-O4      | 1.860                                         | 1.740                             | 1.743                         | 1.823       |
| Fe1-N5      | 2.050                                         | 2.022                             | 1.991                         | 2.096       |
| Fe1-N6      | 2.003                                         | 2.012                             | 1.995                         | 1.968       |
| Fe1-N7      | 2.026                                         | 1.972                             | 1.975                         | 2.193       |
| Fe1-N8      | 2.025                                         | 1.971                             | 1.975                         | 2.193       |
| Fe2-O3      | 1.860                                         | 1.806                             | 1.743                         | 1.823       |
| Fe2-O4      | 1.805                                         | 1.865                             | 1.880                         | 1.784       |
| Fe2-N9      | 2.003                                         | 1.979                             | 1.995                         | 1.968       |
| Fe2-N10     | 2.050                                         | 1.985                             | 1.991                         | 2.096       |
| Fe2-N11     | 2.025                                         | 1.969                             | 1.975                         | 2.193       |
| Fe2-N12     | 2.026                                         | 1.968                             | 1.975                         | 2.193       |
| Fe1...Fe2   | 2.683                                         | 2.647                             | 2.726                         | 2.673       |
| Angle, °    |                                               |                                   |                               |             |
| Fe1-O3-Fe2  | 94.1                                          | 94.0                              | 97.5                          | 95.6        |
| Fe1-O4-Fe2  | 94.1                                          | 94.4                              | 97.5                          | 95.6        |
| O3-Fe1-O4   | 85.9                                          | 87.5                              | 82.5                          | 84.4        |
| O3-Fe2-O4   | 85.9                                          | 84.1                              | 82.5                          | 84.4        |

Relevant structural formula and numbering scheme are shown in Fig. S5.

**Table S5. Force constants obtained from NCA for low and high spin 1**

| Force constants | Internal coordinate | ls <u>1</u> | hs <u>1</u> |
|-----------------|---------------------|-------------|-------------|
| Bonds, mdyne/Å  | Fe1-O3              | 2.6         | 2.0         |
|                 | Fe1-O4              | 1.5         | 1.0         |
|                 | Fe1-N10             | 0.85        | 0.40        |
|                 | Fe1-N11             | 1.5         | 0.75        |
|                 | Fe1-N12             | 1.5         | 0.75        |
|                 | Fe1-N13             | 0.85        | 0.40        |
|                 | O4-C14              | 6.0         | 6.0         |
|                 | C14-N6              | 6.0         | 6.0         |
|                 | Fe2-O3              | 2.6         | 2.0         |
|                 | Fe2-O5              | 1.5         | 1.0         |
|                 | Fe2-N6              | 0.85        | 0.40        |
|                 | Fe2-N7              | 1.5         | 0.75        |
|                 | Fe2-N8              | 1.5         | 0.75        |
|                 | Fe2-N9              | 0.85        | 0.40        |
|                 | O5-C15              | 6.0         | 6.0         |
|                 | C15-N10             | 6.0         | 6.0         |
|                 | Angles, mdyne·Å     | Fe1-O3-Fe2  | 0.35        |
| O3-Fe1-O4       |                     | 0.35        | 0.65        |
| O3-Fe1-N10      |                     | 0.75        | 0.40        |
| O3-Fe1-N12      |                     | 0.75        | 0.65        |
| O3-Fe1-N13      |                     | 0.75        | 0.40        |
| N11-Fe1-O4      |                     | 0.75        | 0.65        |
| N11-Fe1-N10     |                     | 0.35        | 0.33        |
| N11-Fe1-N12     |                     | 0.65        | 0.65        |
| N11-Fe1-N13     |                     | 0.35        | 0.33        |
| O4-Fe1-N10      |                     | 0.75        | 0.40        |
| O4-Fe1-N13      |                     | 0.75        | 0.40        |
| N10-Fe1-N12     |                     | 0.35        | 0.35        |
| N12-Fe1-N13     |                     | 0.35        | 0.35        |
| Fe1-O4-C14      |                     | 0.40        | 0.35        |
| Fe1-N10-C15     |                     | 0.40        | 0.35        |
| O4-C14-N6       |                     | 1.4         | 1.2         |
| O3-Fe2-O5       |                     | 0.35        | 0.65        |
| O3-Fe2-N6       |                     | 0.75        | 0.40        |
| O3-Fe2-N8       |                     | 0.75        | 0.65        |
| O3-Fe2-N9       |                     | 0.75        | 0.40        |
| N7-Fe2-O5       |                     | 0.75        | 0.65        |
| N7-Fe2-N6       |                     | 0.35        | 0.35        |
| N7-Fe2-N8       |                     | 0.65        | 0.65        |
| N7-Fe2-N9       |                     | 0.35        | 0.35        |
| O5-Fe2-N6       |                     | 0.75        | 0.40        |
| O5-Fe2-N9       |                     | 0.75        | 0.40        |
| N6-Fe2-N8       |                     | 0.35        | 0.33        |
| N8-Fe2-N9       |                     | 0.35        | 0.33        |
| Fe2-O5-C15      |                     | 0.40        | 0.35        |
| Fe2-N6-C14      |                     | 0.40        | 0.35        |
| O5-C15-N10      | 1.4                 | 1.2         |             |
| Interactions    | Fe1-O3/Fe1-O3-Fe2   | 0.05        | -0.2        |
|                 | Fe2-O3/Fe1-O3-Fe2   | 0.05        | -0.2        |
|                 | Fe1-O3/O3-Fe1-O4    | 0.10        | 0           |
|                 | Fe2-O3/O3-Fe2-O5    | 0.10        | 0           |
|                 | Fe1-O3/O3-Fe1-N12   | 0.20        | 0           |
|                 | Fe2-O3/O3-Fe2-N8    | 0.20        | 0           |
